# Supplementary material for: Mapping trends and hotspot regarding testicular torsion: A bibliometric analysis of global research (2000–2022)
Source: PubMed Central journal article supplement (PMC10011162; doi:10.3389/fped.2023.1121677), 2023-02-28
Supplement: Datasheet1.pdf [file Datasheet1.pdf]

## Strategies for literature search in testicular torsion :

Databases: SCI-EXPANDED, CPCI-S, CPCI-SSH, BKCI-S, BKCI-SSH

#1: TI=("spermatic cord torsion\*") OR TI=("twisting of the spermatic cord") OR TI=("torsion of testicular cord") OR TI=("testicular torsion\*") OR TI=("pediatric testicular torsion")

#2: AB=("spermatic cord torsion\*") OR AB=("twisting of the spermatic cord") OR AB=("torsion of testicular cord") OR AB=("testicular torsion\*") OR AB=("pediatric testicular torsion")

((#1 OR #2) AND DT=(Article)) AND LA=(English)

DOP: 2000-01-01 to 2022-11-01

Table S1 Ranking of top 30 high-frequency keyword in the testicular torsion study

| Rank | Count | Year | Keyword                     | Rank | Count | Year | Keyword                  |
|------|-------|------|-----------------------------|------|-------|------|--------------------------|
| 1    | 700   | 2000 | testicular torsion          | 16   | 47    | 2000 | contralateral testi      |
| 2    | 235   | 2000 | ischemia reperfusion injury | 17   | 46    | 2000 | nitric oxide             |
| 3    | 169   | 2000 | testi                       | 18   | 45    | 2000 | color doppler sonography |
| 4    | 157   | 2000 | children                    | 19   | 45    | 2000 | injury                   |
| 5    | 156   | 2001 | apoptosis                   | 20   | 45    | 2000 | spermatogenesis          |
| 6    | 133   | 2000 | acute scrotum               | 21   | 44    | 2000 | blood flow               |
| 7    | 129   | 2004 | oxidative stress            | 22   | 44    | 2000 | ischemia                 |
| 8    | 101   | 2000 | diagnosis                   | 23   | 41    | 2013 | risk                     |
| 9    | 88    | 2000 | management                  | 24   | 38    | 2001 | mechanism                |
| 10   | 86    | 2001 | damage                      | 25   | 38    | 2013 | orchietomy               |
| 11   | 83    | 2001 | expression                  | 26   | 37    | 2003 | teste                    |
| 12   | 61    | 2001 | rat                         | 27   | 34    | 2000 | ultrasonography          |
| 13   | 55    | 2000 | ultrasound                  | 28   | 33    | 2000 | sonography               |
| 14   | 50    | 2000 | detorsion                   | 29   | 30    | 2004 | antioxidant              |
| 15   | 49    | 2001 | tissue                      | 30   | 26    | 2005 | exploration              |

Table S2 Ranking of top 14 keywords main clusters in testicular torsion from 2000 to 2022

| Cluster ID | Size | Sihouette | Mean year | Label (LLR, log-likelihood ratio)                                                           |
|------------|------|-----------|-----------|---------------------------------------------------------------------------------------------|
| #0         | 53   | 0.913     | 2007      | acute scrotum; ischemia-reperfusion injury; testicular torsion detorsion; tissue; diagnosis |
| #1         | 47   | 0.958     | 2006      | oxidative stress; apoptosis; children; management; tunica albuginea                         |
| #2         | 45   | 0.867     | 2007      | expression; cell survival; acute scrotum; nitric oxide synthase; adhesion molecules         |

---

|     |    |       |      |                                                                                                                                                   |
|-----|----|-------|------|---------------------------------------------------------------------------------------------------------------------------------------------------|
| #3  | 42 | 0.891 | 2005 | acute scrotum; magnetic resonance imaging; oxidative stress; sonography; exploration                                                              |
| #4  | 41 | 0.91  | 2005 | testicular trauma; diagnosis; children; spermatic cord; color doppler sonography                                                                  |
| #5  | 40 | 0.95  | 2005 | male infertility; pioglitazone; testicular ischaemia; testes torsion; antioxidant                                                                 |
| #6  | 39 | 0.936 | 2002 | melatonin; teste; testicular cancer; hcg stimulation; acid t-lymphocytes; testicular tumor; ejaculation; purinergic transmission; tnf-alpha/tnfr1 |
| #7  | 37 | 0.941 | 2005 | free oxygen radicals; epidermal growth factor; male reproductive tract; garlic extract; sphingosine-1-phosphate                                   |
| #8  | 35 | 0.88  | 2006 | testi; climate; erythropoietin; testicular ischemia-reperfusion; basal membrane                                                                   |
| #9  | 34 | 0.928 | 2003 | undescended testis; testis-undescended; testis-torsion; minimally invasive surgery; testis-nonpalpable                                            |
| #10 | 34 | 0.964 | 2004 | acute scrotal pain; management; newborn; apoptosis; oxidative stress                                                                              |
| #11 | 33 | 0.976 | 2006 | reperfusion injury; nitric oxide; contralateral testis; sildenafil; acute scrotum                                                                 |
| #12 | 32 | 0.876 | 2007 | cryptorchidism; delay; pediatric urology; orchiectomy; orchiopexy                                                                                 |
| #13 | 32 | 0.924 | 2006 |                                                                                                                                                   |

---

### Top 30 References with the Strongest Citation Bursts

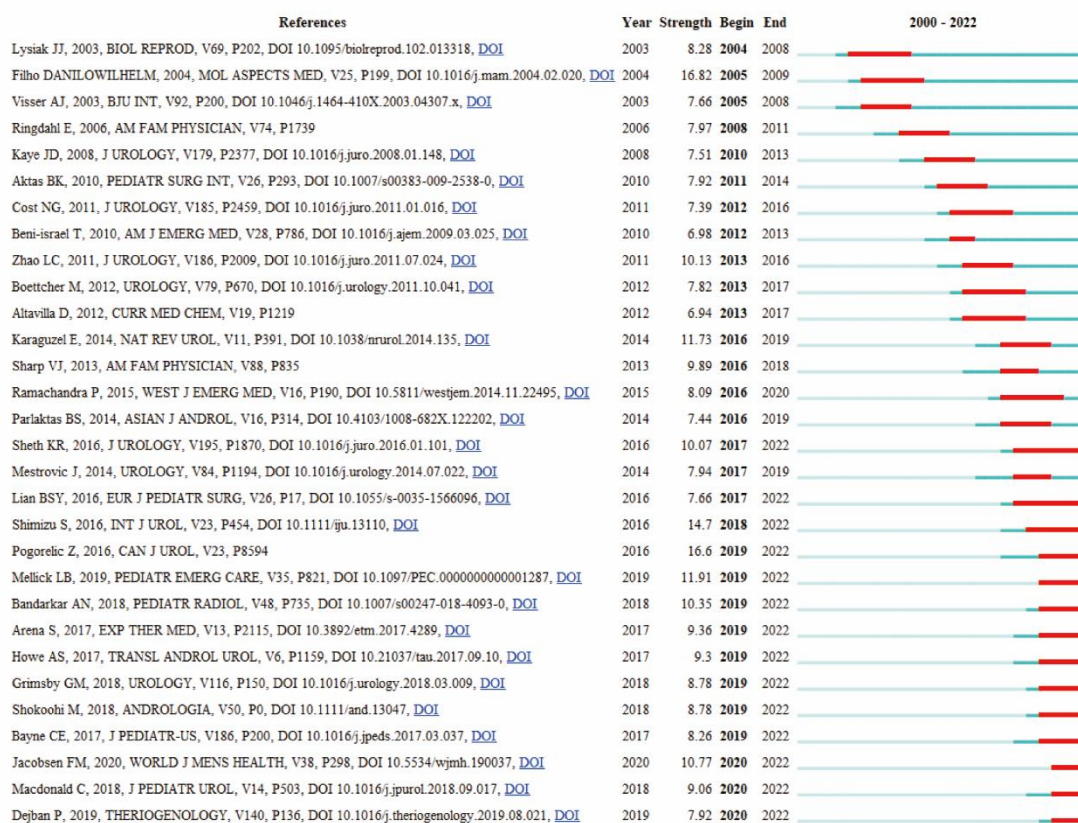

Figure S1 The top 30 cited references sorted by the beginning year of burst. References marked in warm colors indicated a sudden increase in the usage frequency of this reference during that period. Cool colors represented a relatively unpopular time period.
